# Supplementary figures and images for: 3D Virtual Models versus 2D Imaging in Preoperative Planning for Spinal En Bloc Resections: A Comparative Cohort Study
Source: Research Square preprint supplement (doi:10.21203/rs.3.rs-7993081/v1), 2025-11-19

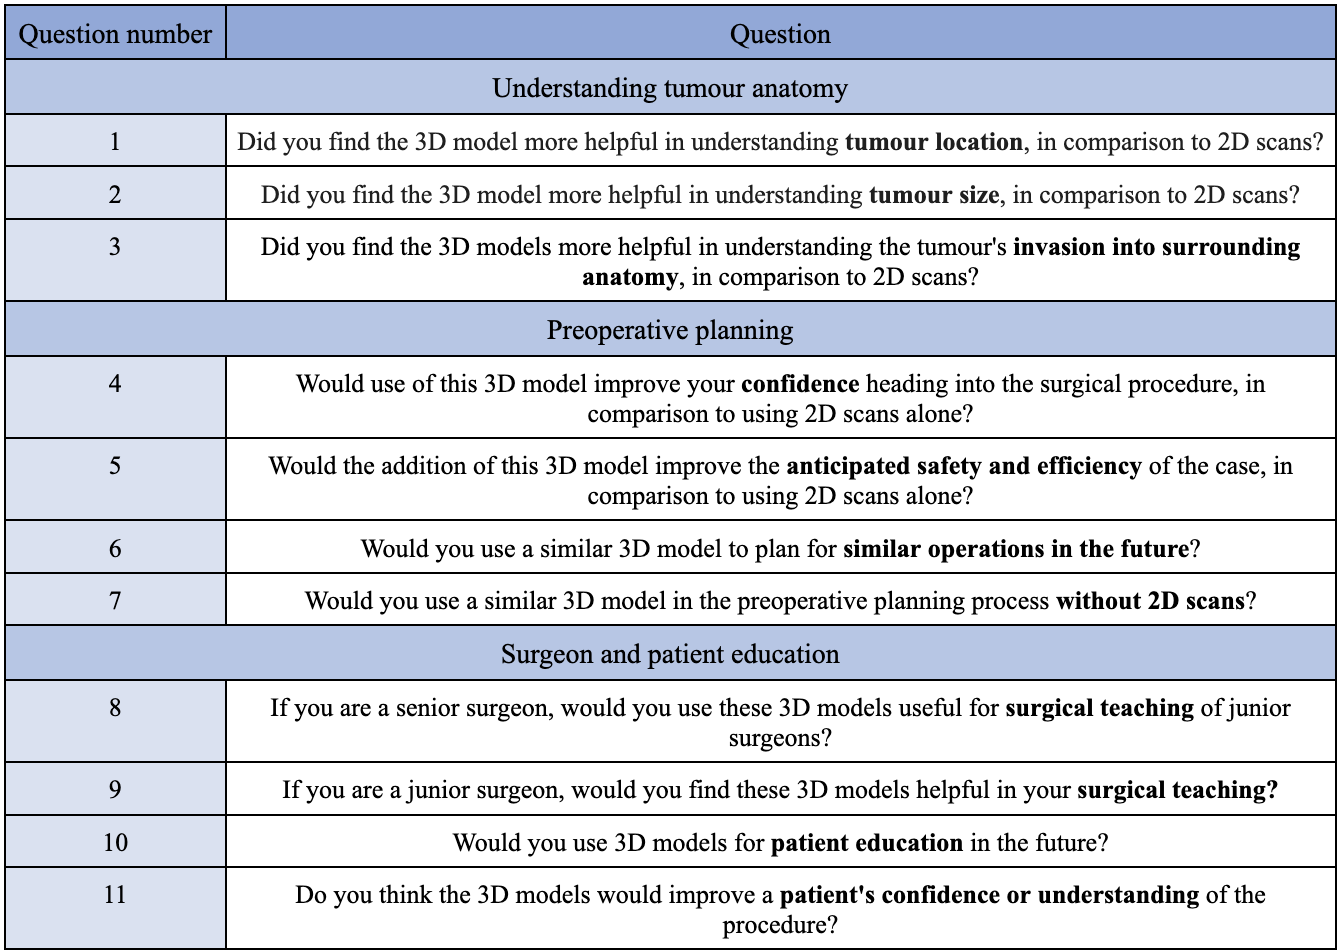

Supplement: Supplementary file 1 [file 284b94e932bd8bc0d903bd2b.docx]

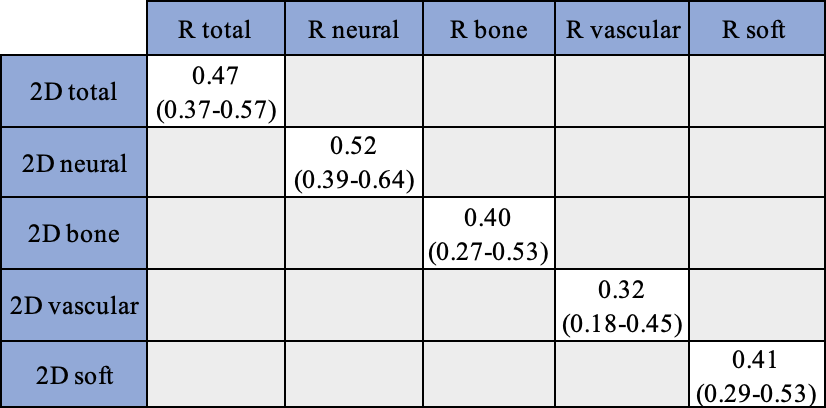

Supplement: Supplementary file 2 [file 38d29f8a346bc409320190fb.docx]

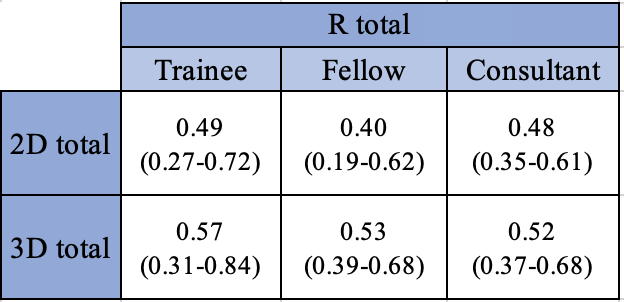

Supplement: Supplementary file 3 [file 548929278e698cd9663a5a3b.docx]

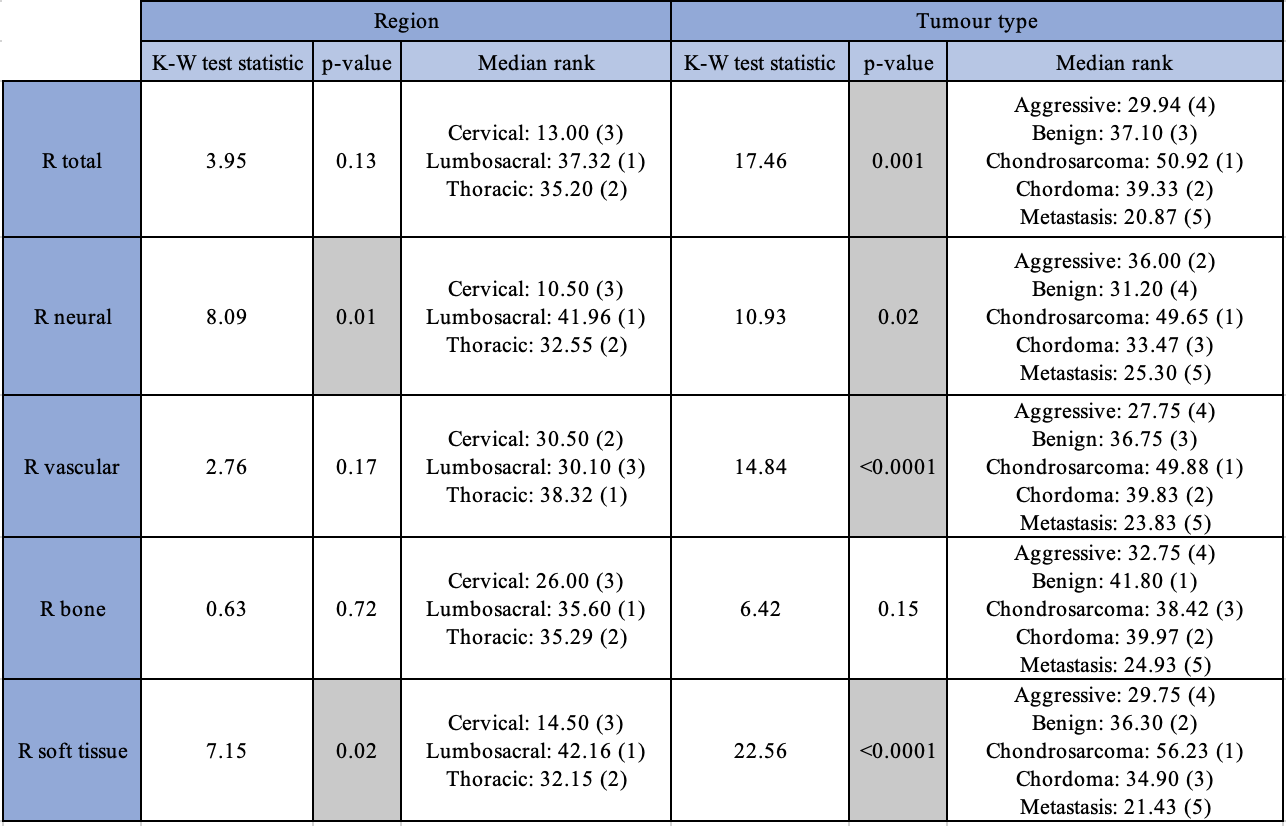

Supplement: Supplementary file 4 [file ea73e7c46644ef4fd3d0a388.docx]
